# Supplementary material
Source: PubMed Central journal article supplement (PMC516091)

Posted as supplied by author.

Figure. Length (pages) of commonly cited hypertension guidelines

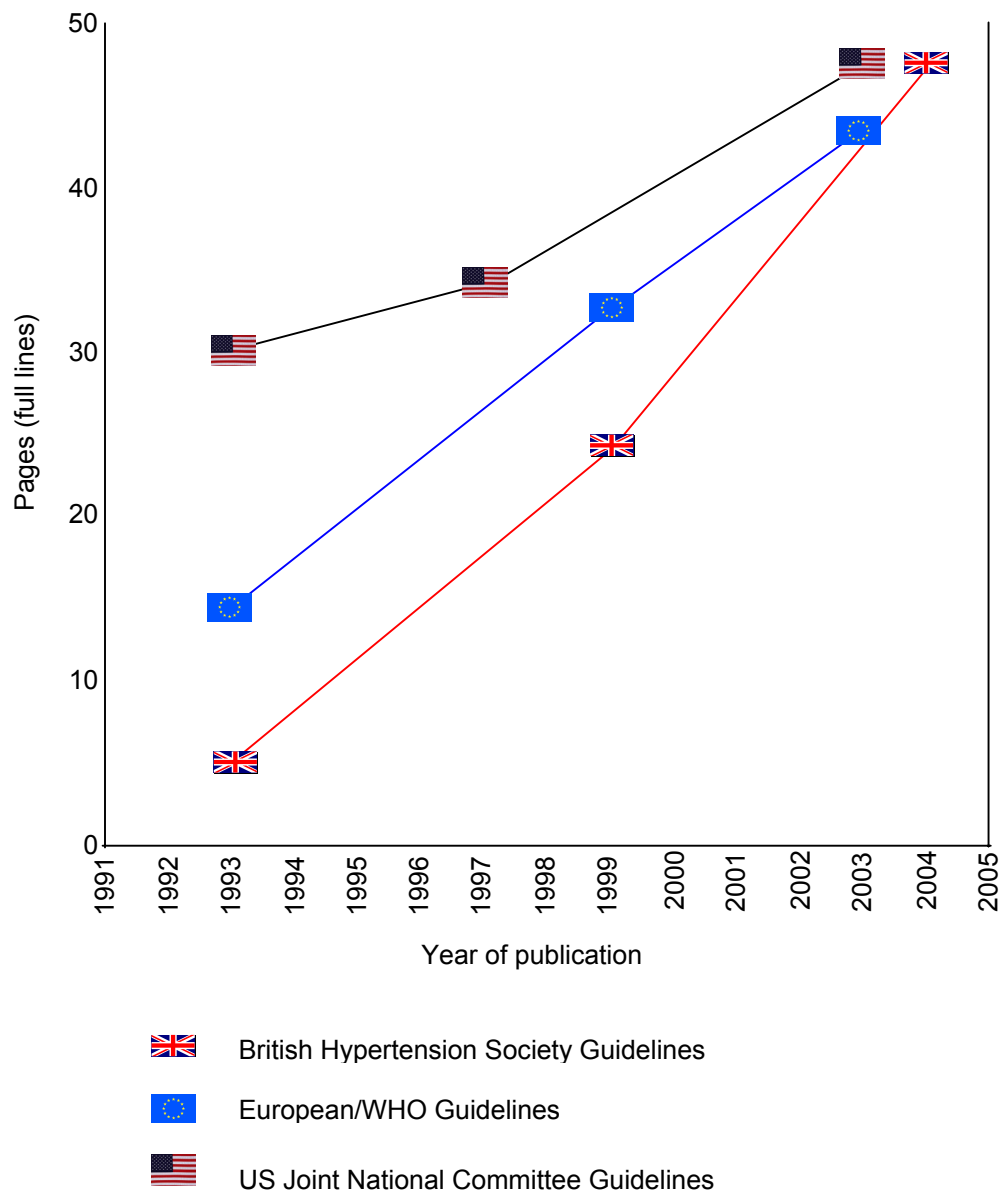

Supplement: bmj_329_7465_523__1.pdf [file bmj_329_7465_523__1.pdf]
